# Supplementary material for: Influence of Sea Ice Anomalies on Antarctic Precipitation Using Source Attribution
Source: Copernicus journal article supplement (doi:10.5194/tc-2019-69), 2019-06-12
Supplement: Supplementary file 1 [file tc-2019-69-supplement.pdf]

Supplementary figures that are referred to in the manuscript:

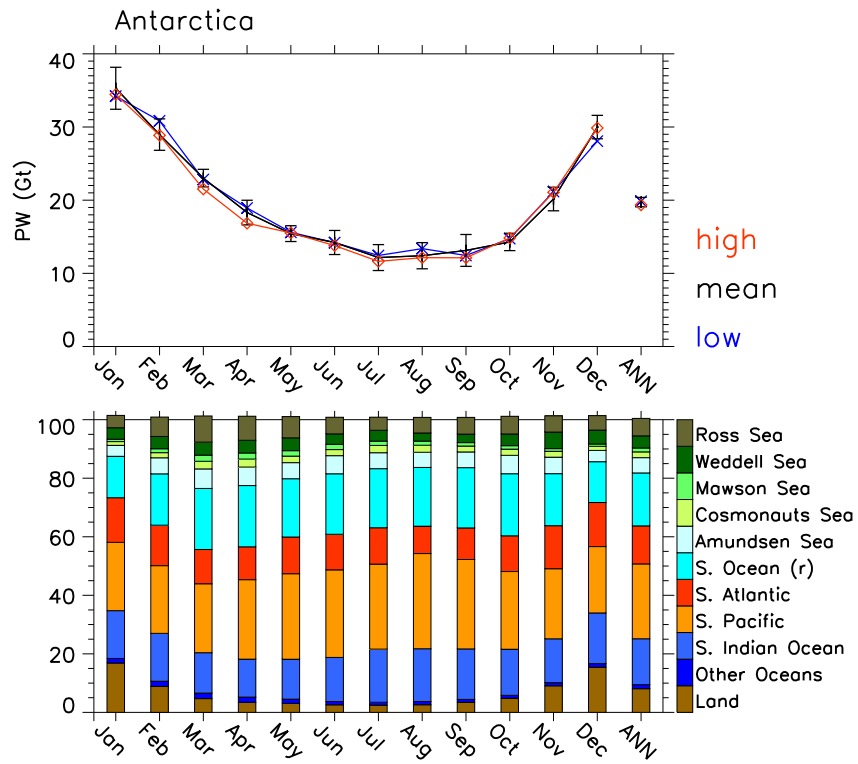

Figure S1: same as Fig. 4 but for precipitable water (PW)

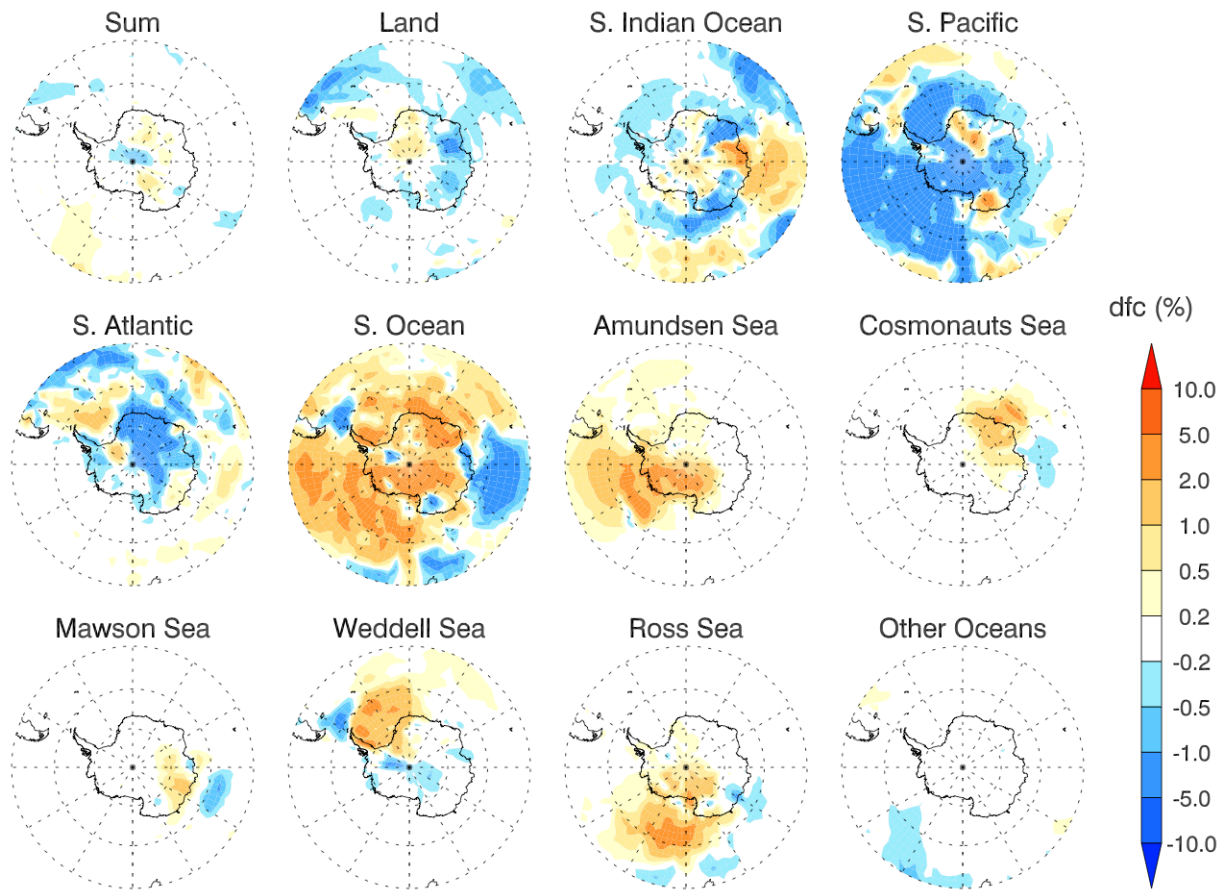

Figure S2: Same as Fig. 5 but for the difference in fractional contribution (%) between "low" and "high" SIC cases.

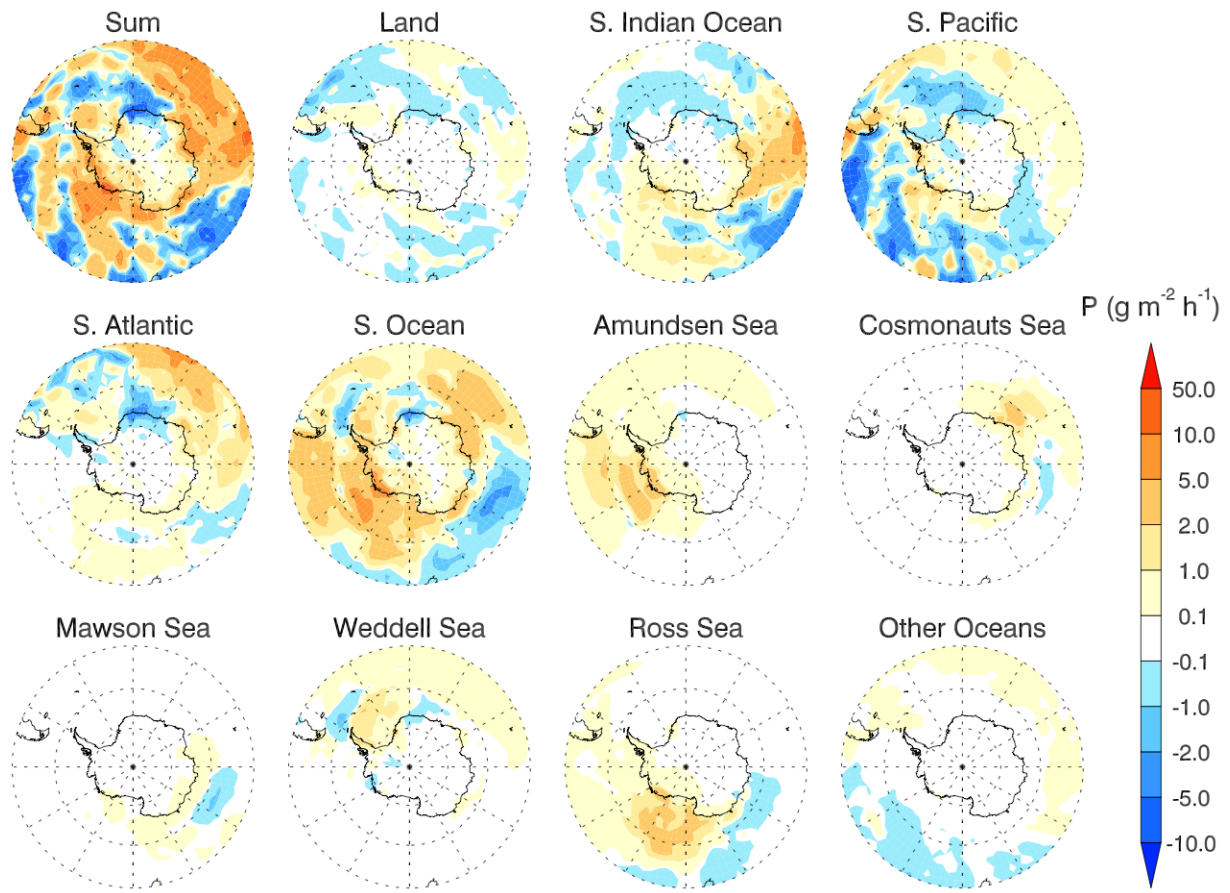

Figure S3: Same as Fig. 5 and Fig. S2 but for the difference in precipitation rate between "low" and "high" SIC cases.

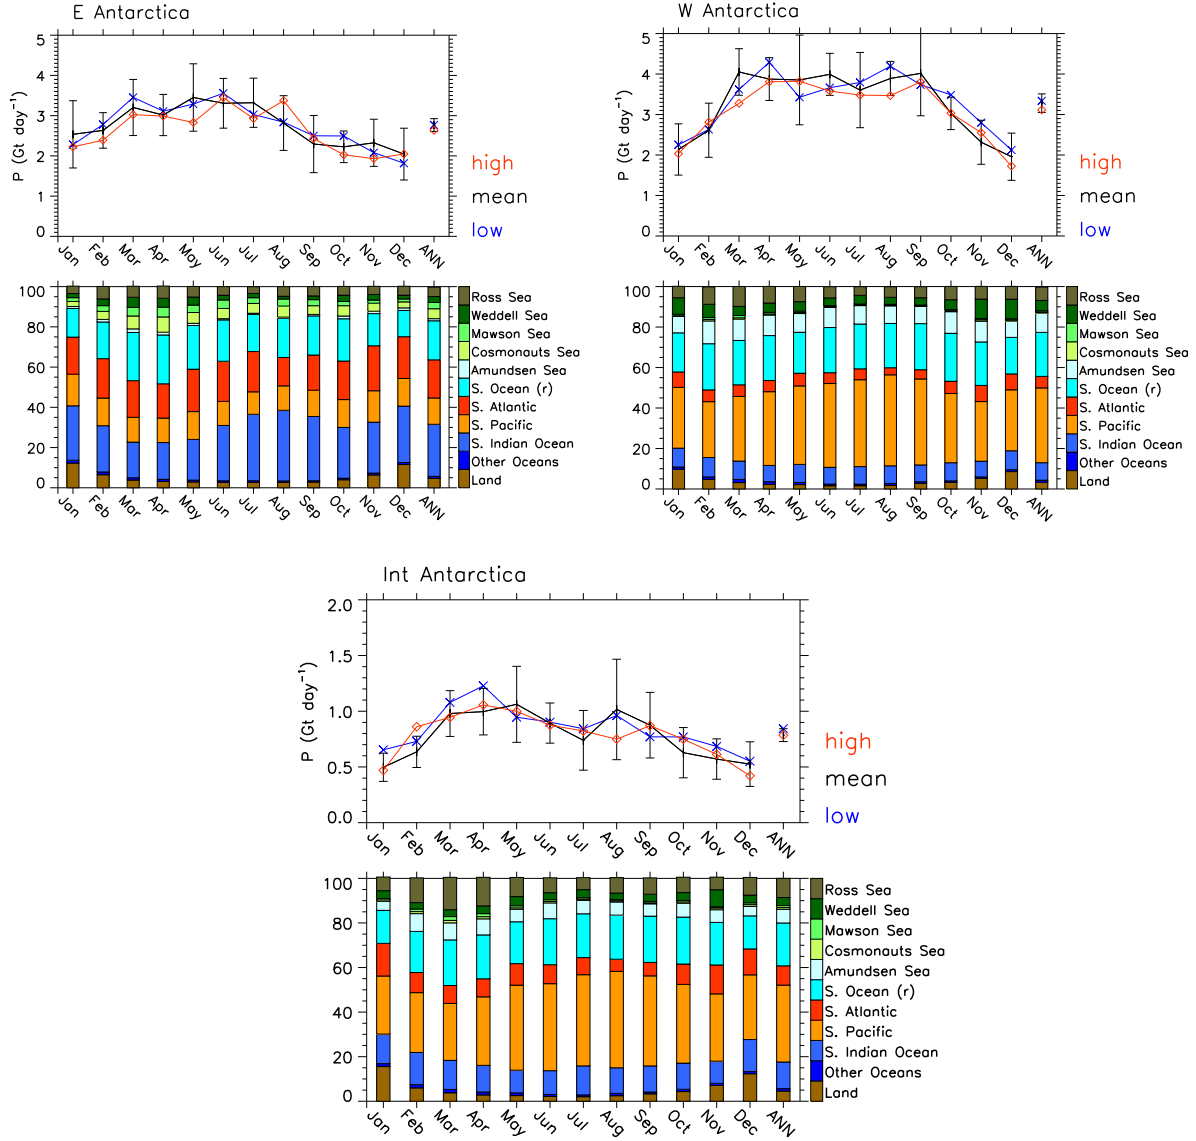

Figure S4: Same as Figure 4 but for precipitation in Eastern Antarctic (top left), Western Antarctic (top right) and Interior Antarctic (bottom).

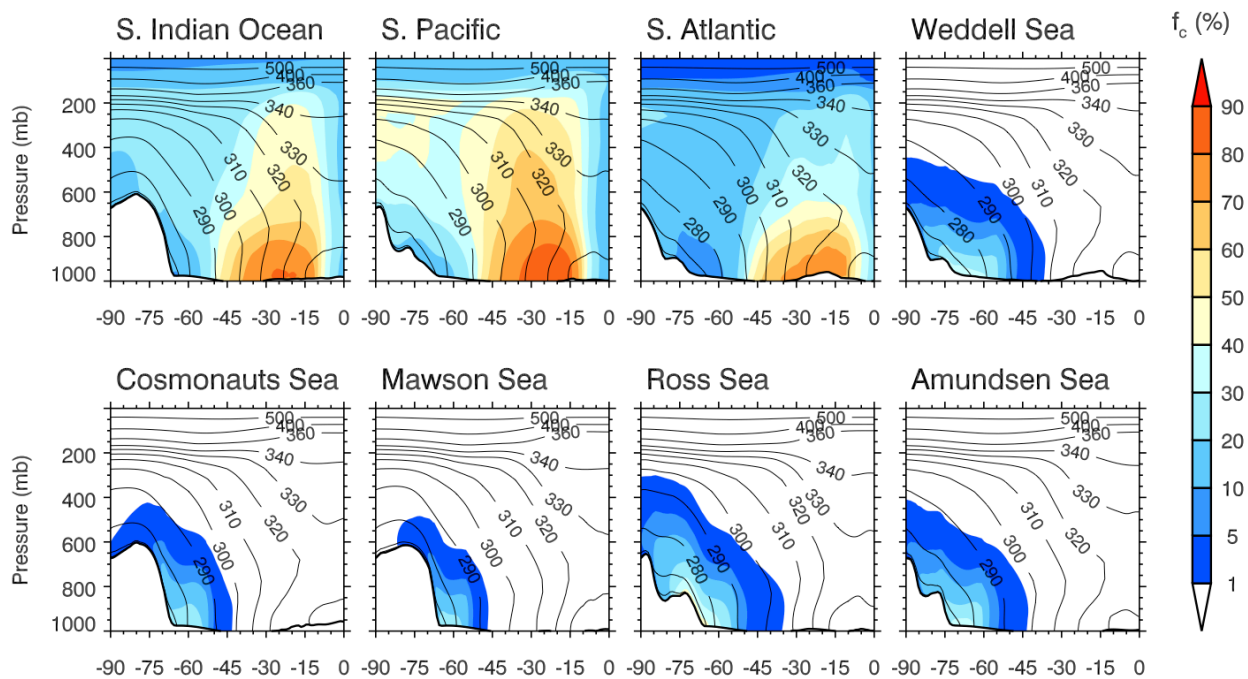

Figure S5: Vertical distribution of fractional contribution (%) to annual and zonal mean water vapor mixing ratio from individual source regions in the “mean” case. Contour lines are zonal mean equivalent potential temperature ( $\theta_e$ ). Zonal mean in each panel is taken along the corresponding longitude band of the source region.
